# Supplementary material
Source: MDPI journal article supplement (https://www.mdpi.com/2073-4352/6/9/102)
Supplement: s1 [file s1]

# checkCIF/PLATON report

Structure factors have been supplied for datablock(s) ne

THIS REPORT IS FOR GUIDANCE ONLY. IF USED AS PART OF A REVIEW PROCEDURE FOR PUBLICATION, IT SHOULD NOT REPLACE THE EXPERTISE OF AN EXPERIENCED CRYSTALLOGRAPHIC REFEREE.

No syntax errors found.      CIF dictionary      Interpreting this report

## Datablock: ne

---

|                 |                                            |                                        |
|-----------------|--------------------------------------------|----------------------------------------|
| Bond precision: | C-C = 0.0127 Å                             | Wavelength=1.54178                     |
| Cell:           | a=22.8582(3)                               | b=23.0300(4)      c=23.0373(3)         |
|                 | alpha=90                                   | beta=90.840(1)      gamma=90           |
| Temperature:    | 150 K                                      |                                        |
|                 | Calculated                                 | Reported                               |
| Volume          | 12126.1(3)                                 | 12126.1(3)                             |
| Space group     | P 21/c                                     | P2(1)/c                                |
| Hall group      | -P 2ybc                                    | ?                                      |
| Moiety formula  | C16 H34 N, 5(C16 H36 N),<br>2(C7 N7 Os), O | 3(C16 H36 N), (C7 N7 Os),<br>0.5(H2 O) |
| Sum formula     | C110 H214 N20 O Os2                        | C55 H109 N10 O0.50 Os                  |
| Mr              | 2213.47                                    | 1108.72                                |
| Dx, g cm-3      | 1.212                                      | 1.215                                  |
| Z               | 4                                          | 8                                      |
| Mu (mm-1)       | 4.281                                      | 4.282                                  |
| F000            | 4696.0                                     | 4712.0                                 |
| F000'           | 4665.92                                    |                                        |
| h,k,lmax        | 28,28,28                                   | 28,27,28                               |
| Nref            | 24136                                      | 23015                                  |
| Tmin,Tmax       | 0.720,0.903                                | 0.900,1.000                            |
| Tmin'           | 0.603                                      |                                        |

Correction method= # Reported T Limits: Tmin=0.900 Tmax=1.000  
AbsCorr = MULTI-SCAN

Data completeness= 0.954      Theta(max)= 72.700

R(reflections)= 0.0541( 14167)      wR2(reflections)= 0.1418( 23015)

S = 0.932      Npar= 1234

---

The following ALERTS were generated. Each ALERT has the format  
**test-name\_ALERT\_alert-type\_alert-level**.  
Click on the hyperlinks for more details of the test.

---

 **Alert level A**

PLAT971\_ALERT\_2\_A Check Calcd Residual Density 1.13A From Os2 4.74 eA-3

**Author Response: The crystal was slightly twinned. The residual electron density has no physical meaning for this reason**

---

 **Alert level B**

PLAT306\_ALERT\_2\_B Isolated Oxygen Atom (H-atoms Missing ?) ..... 01W Check

**Author Response: The atom belongs to solvated water molecule. Due to obvious uncertainty in localization of H atoms in the absence of pronounced H bonds, H atoms could not be refined in calculated positions.**

PLAT934\_ALERT\_3\_B Number of (Iobs-Icalc)/SigmaW > 10 Outliers .... 4 Check

**Author Response: The crystal was slightly twinned. The residual electron density has no physical meaning for this reason**

PLAT971\_ALERT\_2\_B Check Calcd Residual Density 1.04A From Os1 2.96 eA-3

**Author Response: The crystal was slightly twinned. The residual electron density has no physical meaning for this reason**

---

 **Alert level C**

|                   |                                               |                                    |              |
|-------------------|-----------------------------------------------|------------------------------------|--------------|
| PLAT041_ALERT_1_C | Calc. and Reported SumFormula                 | Strings Differ                     | Please Check |
| PLAT043_ALERT_1_C | Calculated and Reported Mol. Weight           | Differ by ..                       | 3.97 Check   |
| PLAT068_ALERT_1_C | Reported F000                                 | Differs from Calcd (or Missing)... | Please Check |
| PLAT094_ALERT_2_C | Ratio of Maximum / Minimum Residual Density   | ....                               | 2.90 Report  |
| PLAT202_ALERT_3_C | Isotropic non-H Atoms in Anion/Solvent        | .....                              | 1 Check      |
| PLAT220_ALERT_2_C | Non-Solvent Resd 6 C Ueq(max)/Ueq(min) Range  |                                    | 3.1 Ratio    |
| PLAT242_ALERT_2_C | Low 'MainMol' Ueq as Compared to Neighbors of |                                    | C123 Check   |
| PLAT342_ALERT_3_C | Low Bond Precision on C-C Bonds               | .....                              | 0.01274 Ang. |
| PLAT430_ALERT_2_C | Short Inter D...A Contact                     | 01W .. N12 ..                      | 2.89 Ang.    |
| PLAT906_ALERT_3_C | Large K value in the Analysis of Variance     | .....                              | 4.923 Check  |
| PLAT911_ALERT_3_C | Missing # FCF Refl Between THmin & STh/L=     | 0.600                              | 321 Report   |
| PLAT971_ALERT_2_C | Check Calcd Residual Density                  | 1.04A From Os1                     | 2.06 eA-3    |

**Author Response: The crystal was slightly twinned. The residual electron density has no physical meaning for this reason**

PLAT971\_ALERT\_2\_C Check Calcd Residual Density 1.36A From Os2 1.73 eA-3

**Author Response: The crystal was slightly twinned. The residual electron density has no physical meaning for this reason**

PLAT971\_ALERT\_2\_C Check Calcd Residual Density 1.15A From C16 1.66 eA-3

**Author Response: The crystal was slightly twinned. The residual electron density has no physical meaning for this reason**

PLAT972\_ALERT\_2\_C Check Calcd Residual Density 0.90A From Os1 -1.79 eA-3  
 PLAT976\_ALERT\_2\_C Check Calcd Residual Density 0.68A From OlW -0.68 eA-3  
 PLAT976\_ALERT\_2\_C Check Calcd Residual Density 0.60A From OlW -0.66 eA-3  
 PLAT976\_ALERT\_2\_C Check Calcd Residual Density 0.73A From OlW -0.62 eA-3  
 PLAT976\_ALERT\_2\_C Check Calcd Residual Density 0.60A From OlW -0.62 eA-3  
 PLAT976\_ALERT\_2\_C Check Calcd Residual Density 0.81A From OlW -0.52 eA-3  
 PLAT978\_ALERT\_2\_C Number C-C Bonds with Positive Residual Density 0 Note

**Alert level G**

FORMU01\_ALERT\_2\_G There is a discrepancy between the atom counts in the  
 \_chemical\_formula\_sum and the formula from the \_atom\_site\* data.  
 Atom count from \_chemical\_formula\_sum: C55 H109 N10 O0.5 Os1  
 Atom count from the \_atom\_site data: C55 H107 N10 O0.5 Os1  
 CELLZ01\_ALERT\_1\_G Difference between formula and atom\_site contents detected.  
 CELLZ01\_ALERT\_1\_G WARNING: H atoms missing from atom site list. Is this intentional?  
 From the CIF: \_cell\_formula\_units\_Z 8  
 From the CIF: \_chemical\_formula\_sum C55 H109 N10 O0.50 Os  
 TEST: Compare cell contents of formula and atom\_site data

| atom | Z*formula | cif sites | diff  |
|------|-----------|-----------|-------|
| C    | 440.00    | 440.00    | 0.00  |
| H    | 872.00    | 856.00    | 16.00 |
| N    | 80.00     | 80.00     | 0.00  |
| O    | 4.00      | 4.00      | 0.00  |
| Os   | 8.00      | 8.00      | 0.00  |

PLAT002\_ALERT\_2\_G Number of Distance or Angle Restraints on AtSite 7 Note  
 PLAT005\_ALERT\_5\_G No Embedded Refinement Details found in the CIF Please Do !  
 PLAT042\_ALERT\_1\_G Calc. and Reported MoietyFormula Strings Differ Please Check  
 PLAT045\_ALERT\_1\_G Calculated and Reported Z Differ by a Factor ... 0.50 Check  
 PLAT230\_ALERT\_2\_G Hirshfeld Test Diff for N25 -- C25 .. 5.6 s.u.  
 PLAT232\_ALERT\_2\_G Hirshfeld Test Diff (M-X) Os1 -- C16 .. 6.3 s.u.  
 PLAT300\_ALERT\_4\_G Atom Site Occupancy of <C64A is Constrained at 0.45 Check  
 PLAT300\_ALERT\_4\_G Atom Site Occupancy of <C64B is Constrained at 0.3 Check  
 PLAT300\_ALERT\_4\_G Atom Site Occupancy of <C64C is Constrained at 0.25 Check  
 PLAT300\_ALERT\_4\_G Atom Site Occupancy of <C65A is Constrained at 0.45 Check  
 PLAT300\_ALERT\_4\_G Atom Site Occupancy of <C65B is Constrained at 0.3 Check  
 PLAT300\_ALERT\_4\_G Atom Site Occupancy of <C65C is Constrained at 0.25 Check  
 PLAT300\_ALERT\_4\_G Atom Site Occupancy of <H64C is Constrained at 0.45 Check  
 PLAT300\_ALERT\_4\_G Atom Site Occupancy of <H64D is Constrained at 0.45 Check  
 PLAT300\_ALERT\_4\_G Atom Site Occupancy of <H64E is Constrained at 0.3 Check  
 PLAT300\_ALERT\_4\_G Atom Site Occupancy of <H64F is Constrained at 0.3 Check  
 PLAT300\_ALERT\_4\_G Atom Site Occupancy of <H64G is Constrained at 0.25 Check  
 PLAT300\_ALERT\_4\_G Atom Site Occupancy of <H64H is Constrained at 0.25 Check  
 PLAT300\_ALERT\_4\_G Atom Site Occupancy of <H65A is Constrained at 0.45 Check  
 PLAT300\_ALERT\_4\_G Atom Site Occupancy of <H65B is Constrained at 0.45 Check  
 PLAT300\_ALERT\_4\_G Atom Site Occupancy of <H65C is Constrained at 0.45 Check  
 PLAT300\_ALERT\_4\_G Atom Site Occupancy of <H65D is Constrained at 0.3 Check  
 PLAT300\_ALERT\_4\_G Atom Site Occupancy of <H65E is Constrained at 0.3 Check  
 PLAT300\_ALERT\_4\_G Atom Site Occupancy of <H65F is Constrained at 0.3 Check  
 PLAT300\_ALERT\_4\_G Atom Site Occupancy of <H65G is Constrained at 0.25 Check

|                                                                    |       |       |
|--------------------------------------------------------------------|-------|-------|
| PLAT300_ALERT_4_G Atom Site Occupancy of <H65H is Constrained at   | 0.25  | Check |
| PLAT300_ALERT_4_G Atom Site Occupancy of <H65I is Constrained at   | 0.25  | Check |
| PLAT301_ALERT_3_G Main Residue Disorder ..... Percentage =         | 2     | Note  |
| PLAT367_ALERT_2_G Long? C(sp?)-C(sp?) Bond C641 - C642 ..          | 1.52  | Ang.  |
| PLAT779_ALERT_4_G Suspect or Irrelevant (Bond) Angle in CIF .... # | 652   | Check |
| C64B -C642 -C64C 1.555 1.555 1.555                                 | 38.10 | Deg.  |
| PLAT790_ALERT_4_G Centre of Gravity not Within Unit Cell: Resd. #  | 4     | Note  |
| C16 H36 N                                                          |       |       |
| PLAT790_ALERT_4_G Centre of Gravity not Within Unit Cell: Resd. #  | 5     | Note  |
| C16 H36 N                                                          |       |       |
| PLAT860_ALERT_3_G Number of Least-Squares Restraints .....         | 15    | Note  |
| PLAT899_ALERT_4_G SHELXL97 is Deprecated and Succeeded by SHELXL   | 2014  | Note  |
| PLAT910_ALERT_3_G Missing # of FCF Reflection(s) Below Theta(Min)  | 3     | Note  |
| PLAT912_ALERT_4_G Missing # of FCF Reflections Above STh/L= 0.600  | 748   | Note  |

---

1 **ALERT level A** = Most likely a serious problem - resolve or explain  
3 **ALERT level B** = A potentially serious problem, consider carefully  
21 **ALERT level C** = Check. Ensure it is not caused by an omission or oversight  
39 **ALERT level G** = General information/check it is not something unexpected

7 ALERT type 1 CIF construction/syntax error, inconsistent or missing data  
22 ALERT type 2 Indicator that the structure model may be wrong or deficient  
8 ALERT type 3 Indicator that the structure quality may be low  
26 ALERT type 4 Improvement, methodology, query or suggestion  
1 ALERT type 5 Informative message, check

---

It is advisable to attempt to resolve as many as possible of the alerts in all categories. Often the minor alerts point to easily fixed oversights, errors and omissions in your CIF or refinement strategy, so attention to these fine details can be worthwhile. In order to resolve some of the more serious problems it may be necessary to carry out additional measurements or structure refinements. However, the purpose of your study may justify the reported deviations and the more serious of these should normally be commented upon in the discussion or experimental section of a paper or in the "special\_details" fields of the CIF. checkCIF was carefully designed to identify outliers and unusual parameters, but every test has its limitations and alerts that are not important in a particular case may appear. Conversely, the absence of alerts does not guarantee there are no aspects of the results needing attention. It is up to the individual to critically assess their own results and, if necessary, seek expert advice.

### Publication of your CIF in IUCr journals

A basic structural check has been run on your CIF. These basic checks will be run on all CIFs submitted for publication in IUCr journals (*Acta Crystallographica*, *Journal of Applied Crystallography*, *Journal of Synchrotron Radiation*); however, if you intend to submit to *Acta Crystallographica Section C* or *E* or *IUCrData*, you should make sure that full publication checks are run on the final version of your CIF prior to submission.

### Publication of your CIF in other journals

Please refer to the *Notes for Authors* of the relevant journal for any special instructions relating to CIF submission.

Datablock ne - ellipsoid plot
