# Supplementary material
Source: MDPI journal article supplement (https://www.mdpi.com/2073-4352/6/9/102)
Supplement: s1 [file s1]

# Supplementary Materials: The First Homoleptic Complex of Seven-Coordinated Osmium: Synthesis and Crystallographical Evidence of Pentagonal Bipyramidal Polyhedron of Heptacyanoosmate(IV)

Eugenia V. Peresyphkina, Anatolie Gavriluta and Kira E. Vostrikova

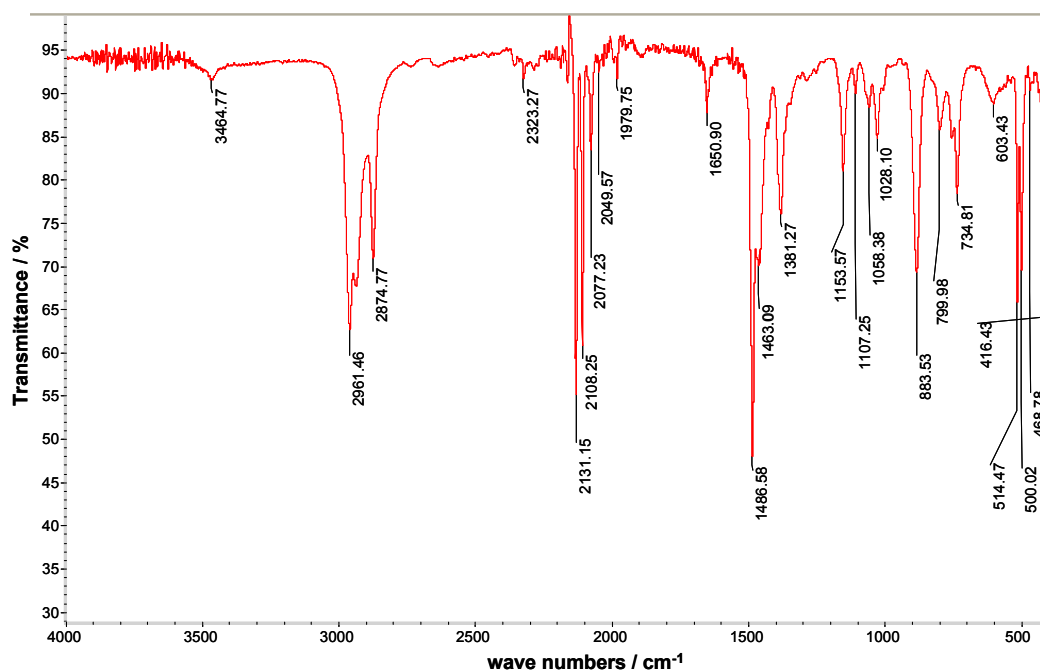

Figure S1. IR spectrum of  $(n\text{-Bu}_4\text{N})_3[\text{Os}(\text{CN})_7] \cdot 0.5\text{H}_2\text{O}$  (1) (reflectance).

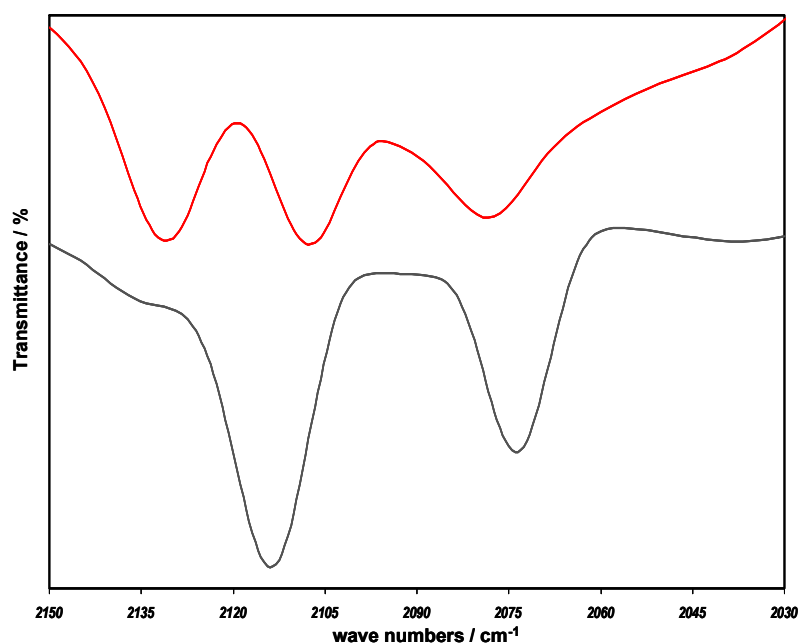

Figure S2.  $\text{CN}^-$  valance stretch region in the IR spectra of:  $(n\text{-Bu}_4\text{N})_3[\text{Os}(\text{CN})_7](\text{H}_2\text{O})_{0.5}$  (red) and  $(n\text{-Bu}_4\text{N})_3[\text{Re}(\text{CN})_7]$  (black) (reflectance).

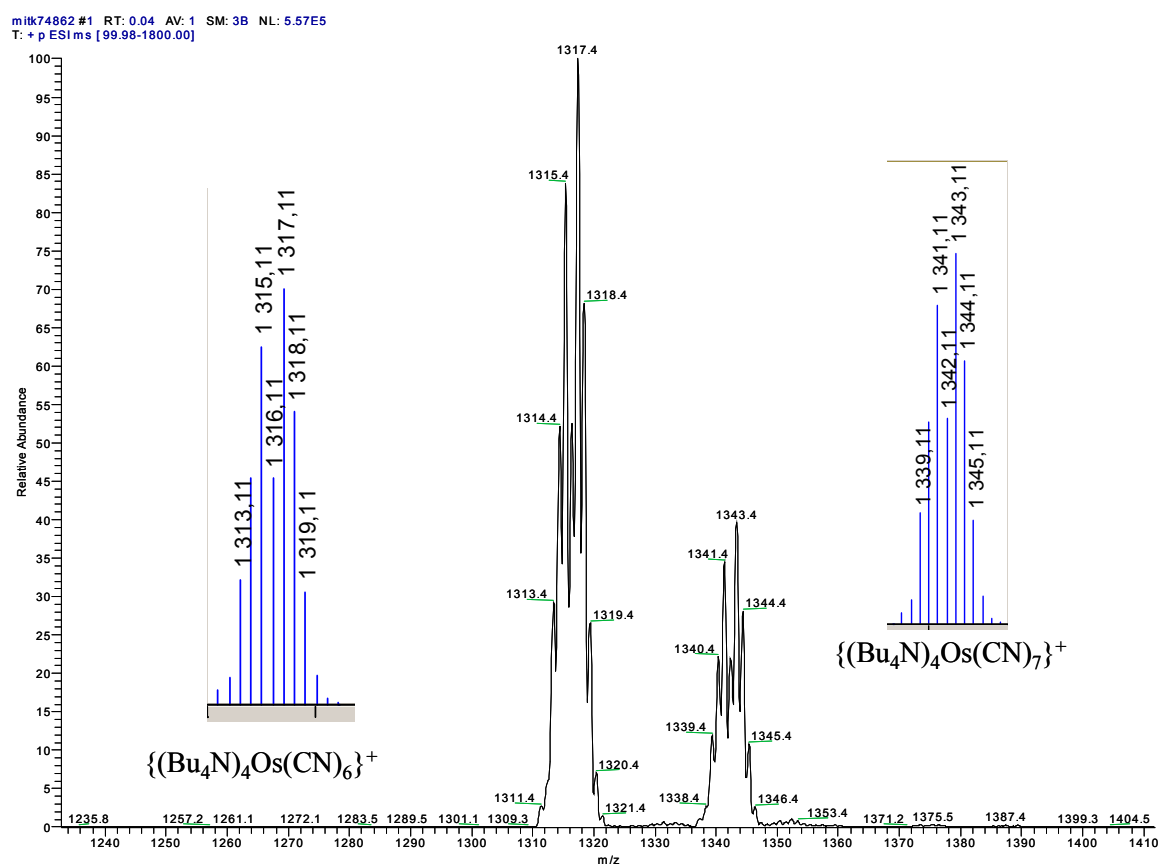Figure S3a. MS-ESI spectrum of the reaction mixture of **1** (cationic part).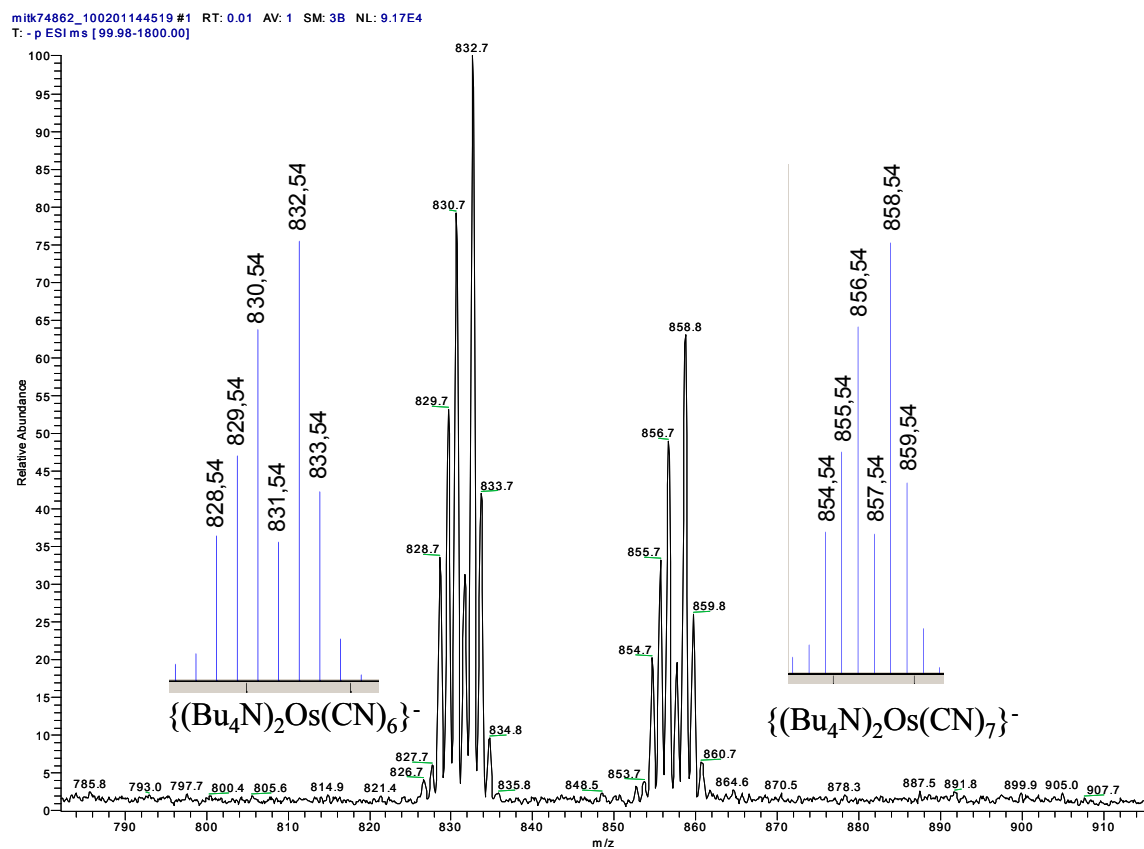Figure S3b. MS-ESI spectrum of the reaction mixture of **1** (anionic part 1).

44901 #1 RT: 0.00 AV: 1 SM: 3B NL: 4.00E4  
0-359.98]

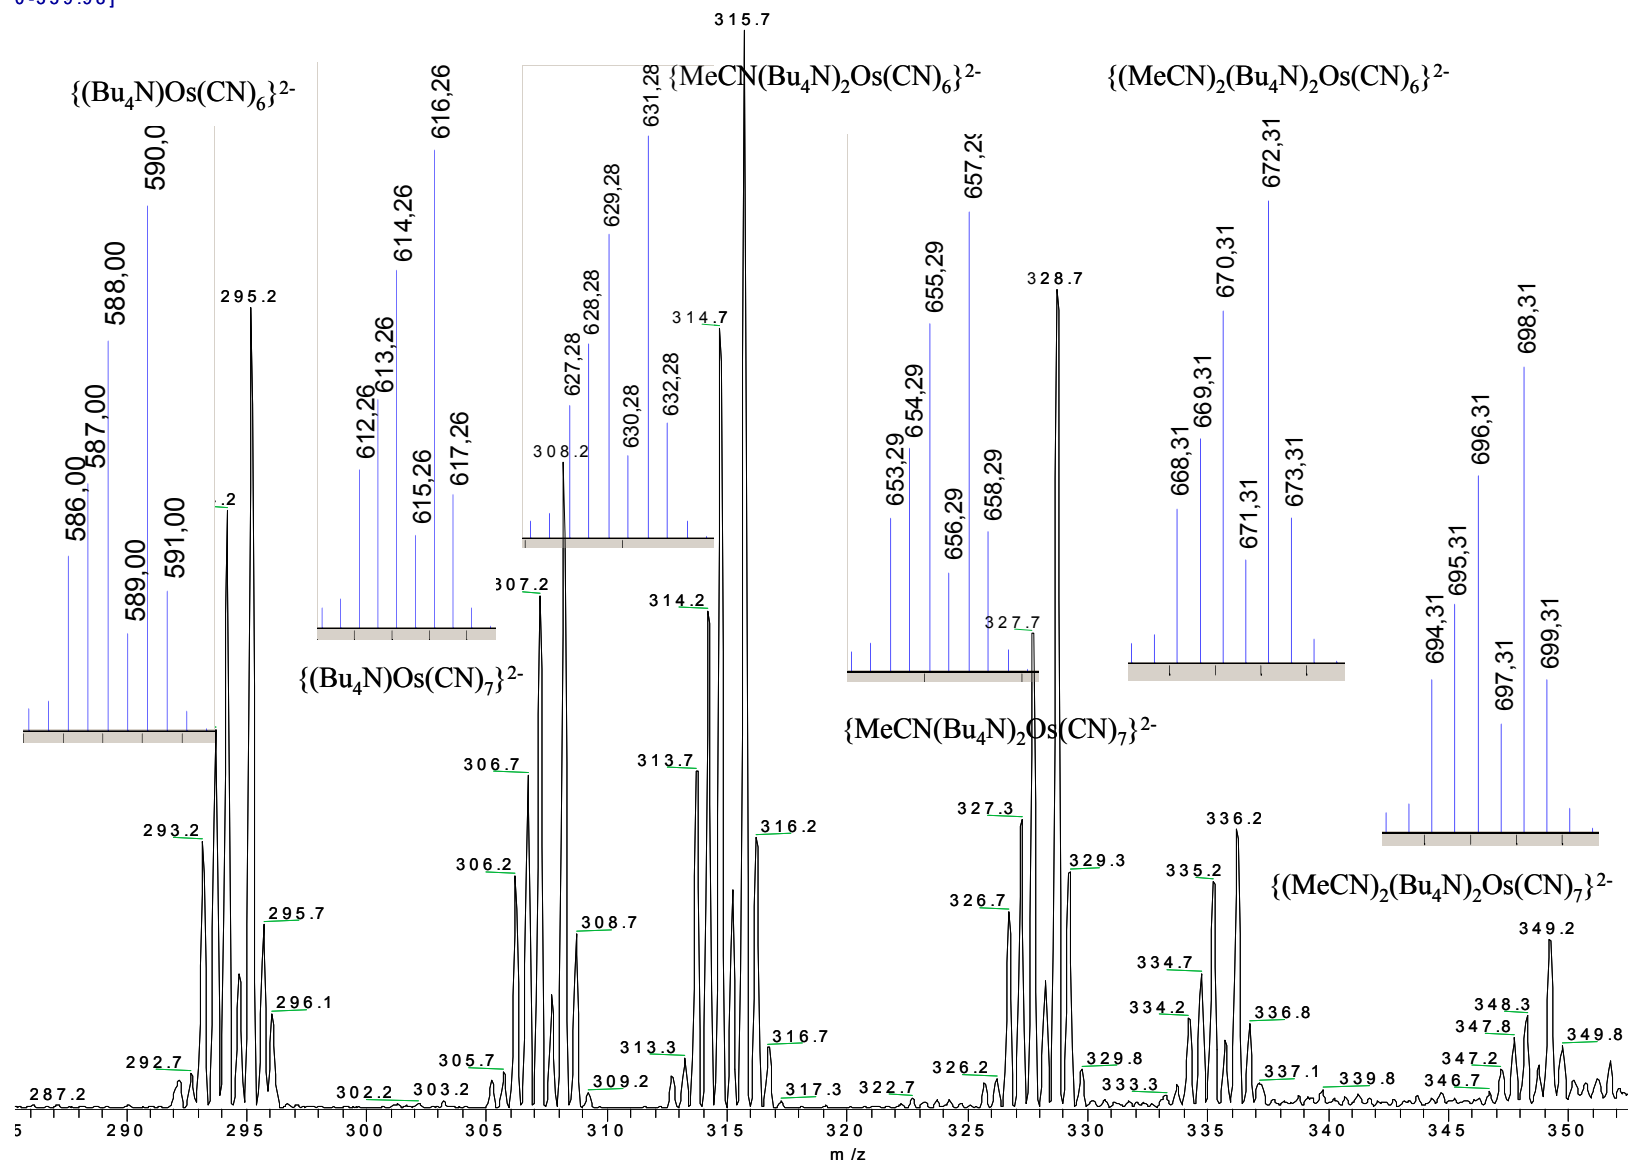

Figure S3c. MS-ESI spectrum of the reaction mixture of 1 (anionic part 2).

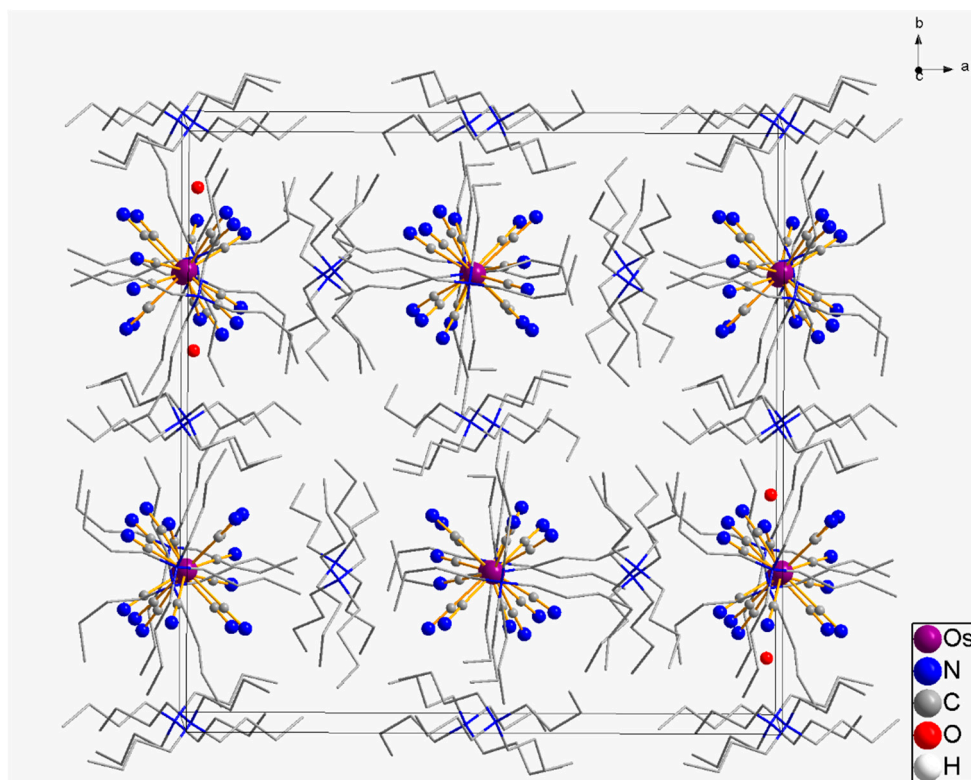

Figure S4. The crystal packing in **1**.

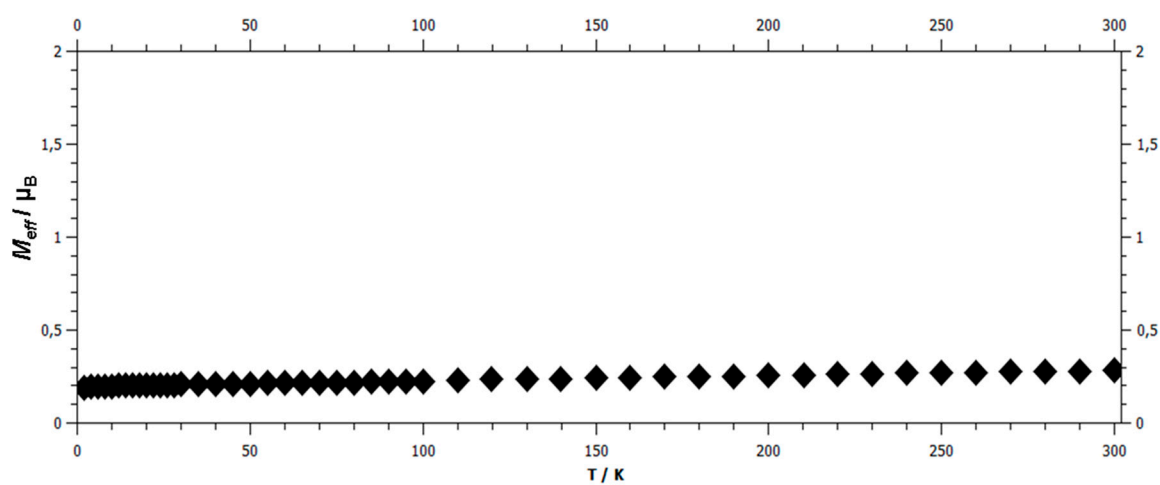

Figure S5. The temperature dependence for the effective magnetic moment of the polycrystalline sample of **1**. Non-zero value of  $M_{eff}$  can be explained by a large measurement error caused by the considerable diamagnetic contribution of  $n\text{-Bu}_4\text{N}^+$  cations and cyanide ligands because their contribution in molecular weight is almost 85%.

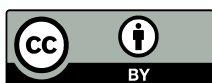

© 2016 by the authors; licensee MDPI, Basel, Switzerland. This article is an open access article distributed under the terms and conditions of the Creative Commons by Attribution (CC-BY) license (<http://creativecommons.org/licenses/by/4.0/>).
